# Supplementary material
Source: PubMed Central journal article supplement (PMC3032282)
Supplement: suppmat.pdf [file suppmat.pdf]

# Chromosome

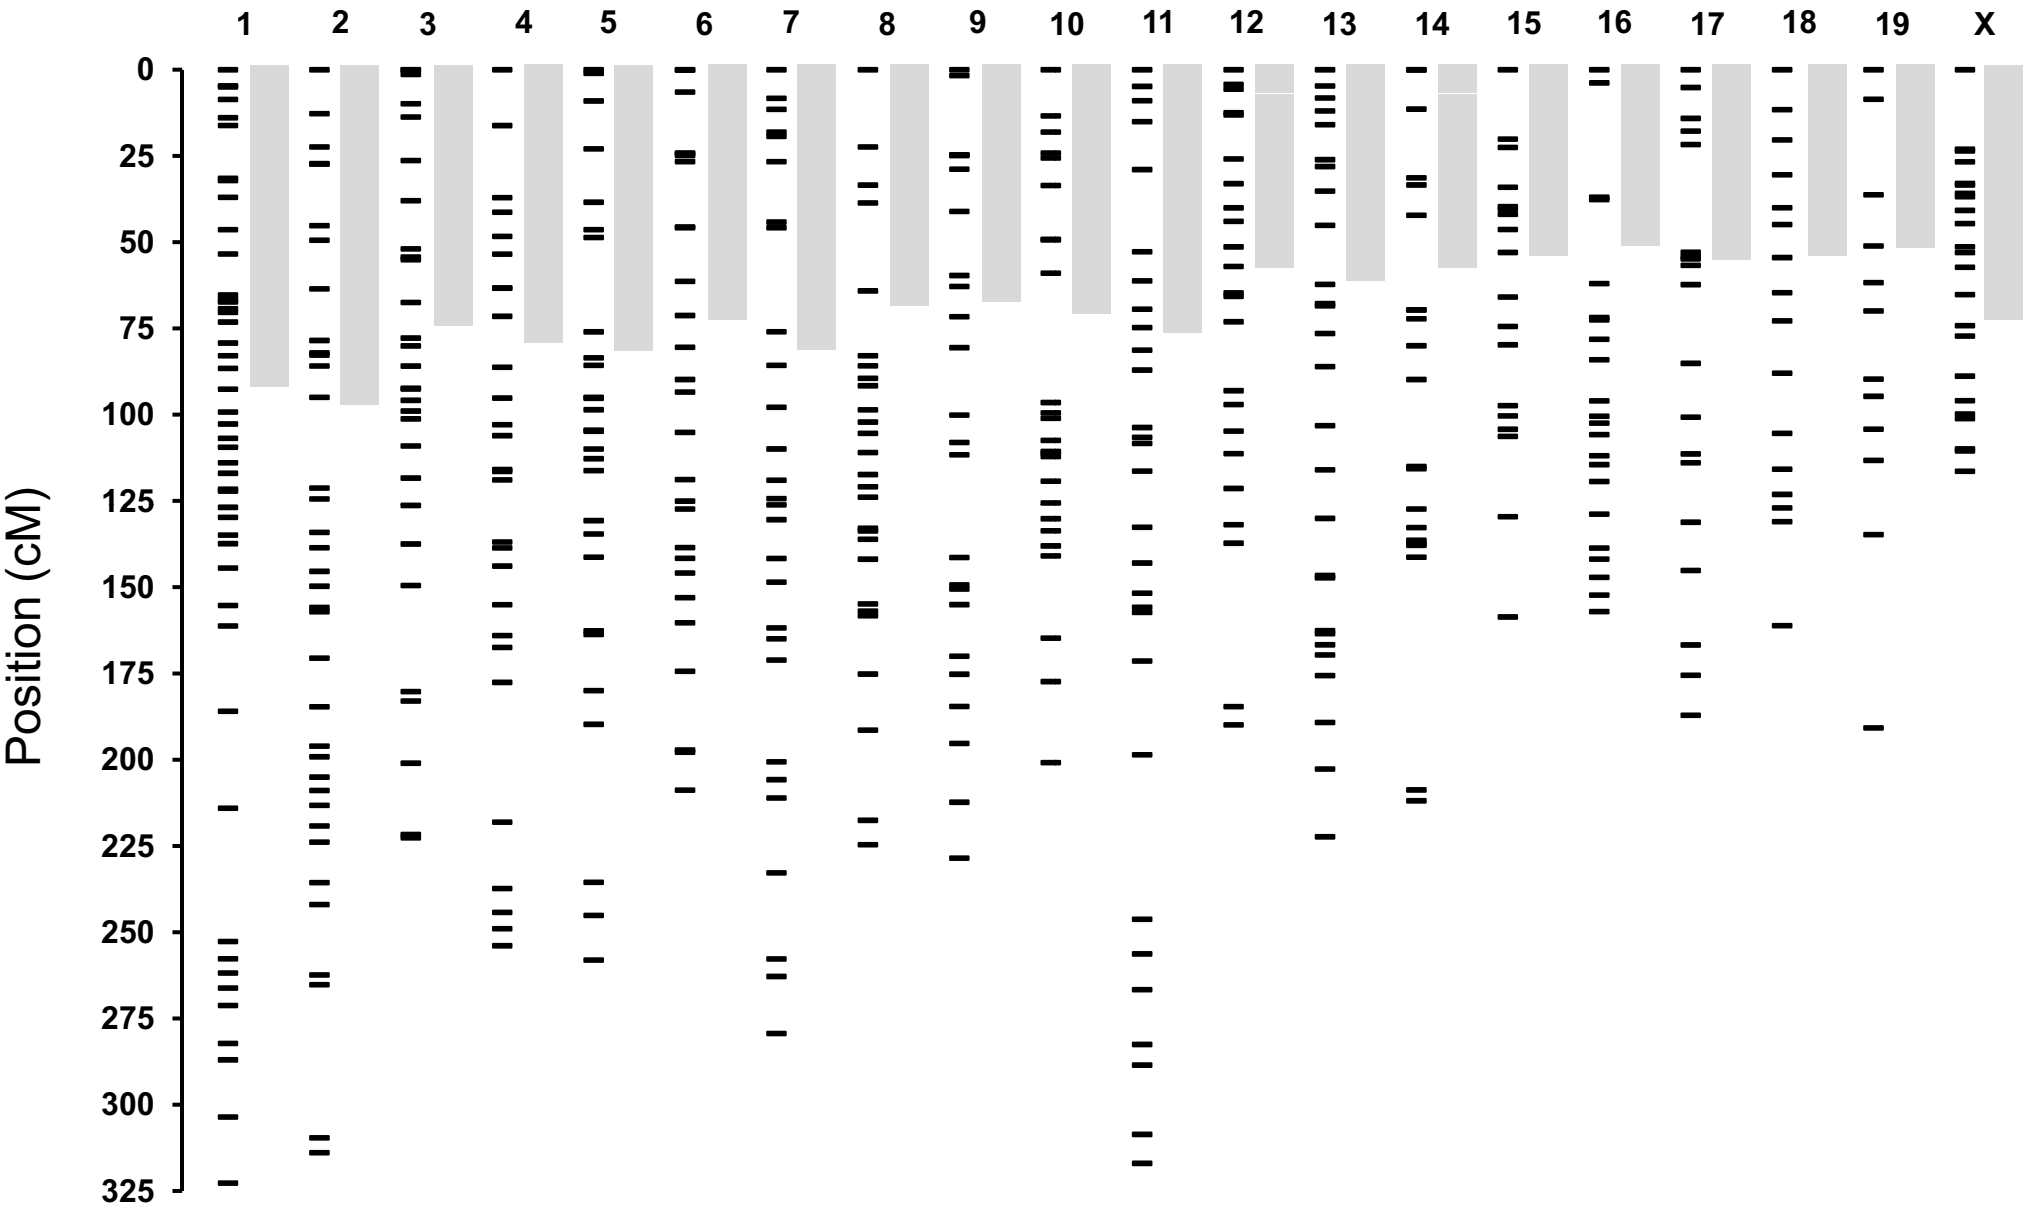

1 **SUPPLEMENTAL MATERIAL**

2

3 **SUPPLEMENTAL FIGURE LEGENDS**

4 Supplemental Fig.1. Genetic linkage map depicting locations (cM) of markers ( $n = 530$ ) in the  
5  $G_4$  population. The production of the  $G_4$  advanced intercross line increased the genetic length of  
6 the entire genome by generating higher levels of recombination relative to a  $F_2$  (see 14). For  
7 comparison, we have added chromosome lengths from a new standard genetic map for the  
8 laboratory mouse (gray shaded area) (11). All positions (including those from 11) were based on  
9 a sex-averaged map, with the exception of the X chromosome, which was based on the female  
10 map only.

11

12 **SUPPLEMENTAL TABLES**

13 Supplemental Table 1. *SNPs (n = 530) used in the final analyses of the G<sub>4</sub> population of mice*  
 14 *with known physical (Mb) locations*

| SNP         | MMU | Position (Mb) | SNP         | MMU | Position (Mb) |
|-------------|-----|---------------|-------------|-----|---------------|
| JAX00240652 | 1   | 3.46          | JAX00009797 | 1   | 136.28        |
| JAX00000321 | 1   | 7.30          | JAX00268776 | 1   | 139.51        |
| JAX00241694 | 1   | 9.99          | JAX00269922 | 1   | 145.97        |
| JAX00000760 | 1   | 13.23         | JAX00010715 | 1   | 148.55        |
| JAX00001021 | 1   | 16.68         | JAX00010980 | 1   | 152.08        |
| JAX00243650 | 1   | 20.14         | JAX00011133 | 1   | 154.11        |
| JAX00244717 | 1   | 24.81         | JAX00275074 | 1   | 169.61        |
| JAX00002001 | 1   | 29.77         | JAX00012316 | 1   | 170.02        |
| JAX00188707 | 1   | 33.66         | JAX00275695 | 1   | 171.81        |
| JAX00247128 | 1   | 36.76         | JAX00276519 | 1   | 175.07        |
| JAX00002741 | 1   | 39.61         | JAX00277411 | 1   | 178.74        |
| JAX00003014 | 1   | 43.27         | JAX00278821 | 1   | 185.33        |
| JAX00249585 | 1   | 46.33         | JAX00013696 | 1   | 188.78        |
| JAX00250156 | 1   | 50.06         | JAX00280187 | 1   | 191.76        |
| JAX00003704 | 1   | 52.50         | JAX00280986 | 1   | 195.62        |
| JAX00251429 | 1   | 55.40         | JAX00090971 | 2   | 7.61          |
| JAX00004537 | 1   | 63.62         | JAX00483290 | 2   | 10.81         |
| JAX00253602 | 1   | 66.22         | JAX00091402 | 2   | 13.35         |
| JAX00004954 | 1   | 69.19         | JAX00484496 | 2   | 19.39         |
| JAX00254795 | 1   | 72.80         | JAX00484539 | 2   | 19.57         |
| JAX00005495 | 1   | 76.41         | JAX00091876 | 2   | 19.68         |
| JAX00005735 | 1   | 79.62         | JAX00092635 | 2   | 29.85         |
| JAX00257356 | 1   | 82.62         | JAX00092666 | 2   | 30.26         |
| JAX00258190 | 1   | 89.77         | JAX00092942 | 2   | 33.94         |
| JAX00259020 | 1   | 93.04         | JAX00093554 | 2   | 42.23         |
| JAX00260131 | 1   | 98.83         | JAX00093881 | 2   | 46.59         |
| JAX00261568 | 1   | 106.63        | JAX00094170 | 2   | 50.47         |
| JAX00008045 | 1   | 112.67        | JAX00094385 | 2   | 53.29         |
| JAX00263199 | 1   | 115.56        | JAX00094639 | 2   | 56.70         |
| JAX00008766 | 1   | 122.52        | JAX00094839 | 2   | 59.40         |
| JAX00265393 | 1   | 126.39        | JAX00095470 | 2   | 67.85         |
| JAX00009649 | 1   | 134.31        | JAX00095583 | 2   | 69.34         |

15

16

## 17 Supplemental Table 1...continued

18

| SNP         | MMU | Position (Mb) | SNP         | MMU | Position (Mb) |
|-------------|-----|---------------|-------------|-----|---------------|
| JAX00493169 | 2   | 73.87         | JAX00109931 | 3   | 86.29         |
| JAX00493664 | 2   | 76.35         | JAX00110107 | 3   | 88.65         |
| JAX00096391 | 2   | 80.17         | JAX00110808 | 3   | 98.33         |
| JAX00096585 | 2   | 82.78         | JAX00110851 | 3   | 99.01         |
| JAX00097085 | 2   | 89.55         | JAX00111276 | 3   | 104.69        |
| JAX00496243 | 2   | 91.83         | JAX00111864 | 3   | 112.60        |
| JAX00097778 | 2   | 99.04         | JAX00189283 | 3   | 119.29        |
| JAX00498192 | 2   | 102.76        | JAX00189293 | 3   | 125.60        |
| JAX00098514 | 2   | 109.20        | JAX00113499 | 3   | 134.56        |
| JAX00098814 | 2   | 113.18        | JAX00538751 | 3   | 136.05        |
| JAX00500486 | 2   | 115.58        | JAX00114351 | 3   | 145.92        |
| JAX00099246 | 2   | 118.98        | JAX00542768 | 3   | 154.45        |
| JAX00501779 | 2   | 122.68        | JAX00543027 | 3   | 156.02        |
| JAX00099979 | 2   | 128.74        | JAX00115604 | 4   | 6.06          |
| JAX00100245 | 2   | 132.30        | JAX00544225 | 4   | 7.08          |
| JAX00100567 | 2   | 136.58        | JAX00116659 | 4   | 20.38         |
| JAX00100848 | 2   | 140.35        | JAX00116950 | 4   | 24.42         |
| JAX00508265 | 2   | 155.71        | JAX00117341 | 4   | 29.71         |
| JAX00509136 | 2   | 159.30        | JAX00117573 | 4   | 33.02         |
| JAX00511966 | 2   | 172.51        | JAX00117972 | 4   | 38.40         |
| JAX00103392 | 2   | 174.30        | JAX00548707 | 4   | 39.69         |
| JAX00103973 | 3   | 6.19          | JAX00549337 | 4   | 44.04         |
| JAX00104028 | 3   | 6.94          | JAX00119104 | 4   | 54.22         |
| JAX00104180 | 3   | 8.97          | JAX00119212 | 4   | 55.65         |
| JAX00515950 | 3   | 18.57         | JAX00189438 | 4   | 58.47         |
| JAX00105078 | 3   | 21.37         | JAX00552983 | 4   | 64.17         |
| JAX00105505 | 3   | 27.12         | JAX00554143 | 4   | 71.10         |
| JAX00189155 | 3   | 33.46         | JAX00120481 | 4   | 73.52         |
| JAX00520666 | 3   | 40.32         | JAX00554899 | 4   | 76.13         |
| JAX00106771 | 3   | 44.02         | JAX00557140 | 4   | 88.28         |
| JAX00107199 | 3   | 49.78         | JAX00121671 | 4   | 89.43         |
| JAX00107680 | 3   | 56.18         | JAX00121710 | 4   | 89.94         |
| JAX00524422 | 3   | 60.23         | JAX00121898 | 4   | 92.50         |
| JAX00524828 | 3   | 63.25         | JAX00122676 | 4   | 102.85        |
| JAX00108421 | 3   | 66.14         | JAX00561847 | 4   | 109.15        |
| JAX00526713 | 3   | 73.72         | JAX00123647 | 4   | 116.30        |
| JAX00109133 | 3   | 75.68         | JAX00563495 | 4   | 118.55        |
| JAX00109693 | 3   | 83.13         | JAX00567938 | 4   | 135.79        |

## 19 Supplemental Table 1...continued

20

| SNP         | MMU | Position (Mb) | SNP         | MMU | Position (Mb) |
|-------------|-----|---------------|-------------|-----|---------------|
| JAX00568742 | 4   | 139.34        | JAX00139789 | 6   | 36.30         |
| JAX00569432 | 4   | 142.03        | JAX00140451 | 6   | 45.15         |
| JAX00570195 | 4   | 147.27        | JAX00608826 | 6   | 46.81         |
| JAX00126017 | 4   | 149.26        | JAX00141073 | 6   | 53.58         |
| JAX00573023 | 5   | 7.19          | JAX00612506 | 6   | 67.44         |
| JAX00127022 | 5   | 10.64         | JAX00142749 | 6   | 76.13         |
| JAX00127317 | 5   | 15.41         | JAX00615985 | 6   | 83.23         |
| JAX00127722 | 5   | 20.81         | JAX00143736 | 6   | 89.31         |
| JAX00128228 | 5   | 28.49         | JAX00617746 | 6   | 92.62         |
| JAX00128632 | 5   | 33.91         | JAX00618398 | 6   | 94.98         |
| JAX00128815 | 5   | 36.39         | JAX00619072 | 6   | 97.99         |
| JAX00581045 | 5   | 46.89         | JAX00144705 | 6   | 102.24        |
| JAX00581735 | 5   | 49.99         | JAX00621926 | 6   | 109.87        |
| JAX00582506 | 5   | 52.91         | JAX00622369 | 6   | 112.22        |
| JAX00584541 | 5   | 65.04         | JAX00623316 | 6   | 115.91        |
| JAX00131070 | 5   | 66.45         | JAX00189941 | 6   | 118.94        |
| JAX00131182 | 5   | 67.96         | JAX00624709 | 6   | 122.61        |
| JAX00586379 | 5   | 75.10         | JAX00626640 | 6   | 132.92        |
| JAX00131790 | 5   | 76.06         | JAX00189987 | 6   | 139.28        |
| JAX00131820 | 5   | 77.23         | JAX00629129 | 6   | 142.21        |
| JAX00131888 | 5   | 78.14         | JAX00630018 | 6   | 145.23        |
| JAX00132785 | 5   | 90.09         | JAX00148257 | 7   | 3.77          |
| JAX00133006 | 5   | 93.05         | JAX00148474 | 7   | 6.72          |
| JAX00133202 | 5   | 96.86         | JAX00190016 | 7   | 13.48         |
| JAX00133397 | 5   | 99.48         | JAX00149076 | 7   | 17.09         |
| JAX00592675 | 5   | 113.20        | JAX00633165 | 7   | 19.09         |
| JAX00593521 | 5   | 116.34        | JAX00149554 | 7   | 26.95         |
| JAX00594409 | 5   | 119.65        | JAX00635190 | 7   | 34.29         |
| JAX00135190 | 5   | 123.43        | JAX00635952 | 7   | 36.42         |
| JAX00599257 | 5   | 139.84        | JAX00638745 | 7   | 50.07         |
| JAX00599877 | 5   | 142.39        | JAX00641805 | 7   | 65.96         |
| JAX00137098 | 5   | 149.15        | JAX00152597 | 7   | 69.87         |
| JAX00602977 | 6   | 10.24         | JAX00643377 | 7   | 73.22         |
| JAX00603343 | 6   | 13.27         | JAX00153077 | 7   | 76.26         |
| JAX00138460 | 6   | 18.56         | JAX00190133 | 7   | 79.92         |
| JAX00139228 | 6   | 28.82         | JAX00645408 | 7   | 82.64         |
| JAX00139316 | 6   | 29.99         | JAX00645933 | 7   | 85.85         |
| JAX00139528 | 6   | 32.81         | JAX00154099 | 7   | 89.95         |

21 Supplemental Table 1...*continued*

22

| SNP         | MMU | Position (Mb) | SNP         | MMU | Position (Mb) |
|-------------|-----|---------------|-------------|-----|---------------|
| JAX00154329 | 7   | 93.00         | JAX00167703 | 9   | 4.54          |
| JAX00155508 | 7   | 108.92        | JAX00167904 | 9   | 7.24          |
| JAX00155743 | 7   | 112.05        | JAX00687899 | 9   | 25.32         |
| JAX00155961 | 7   | 114.94        | JAX00169293 | 9   | 25.85         |
| JAX00156517 | 7   | 122.38        | JAX00169301 | 9   | 25.94         |
| JAX00156769 | 7   | 125.73        | JAX00688081 | 9   | 26.77         |
| JAX00655512 | 7   | 128.31        | JAX00190451 | 9   | 29.69         |
| JAX00157304 | 7   | 132.85        | JAX00169834 | 9   | 33.05         |
| JAX00657603 | 7   | 137.70        | JAX00170132 | 9   | 37.11         |
| JAX00658030 | 7   | 139.06        | JAX00170532 | 9   | 42.46         |
| JAX00659205 | 7   | 145.07        | JAX00170819 | 9   | 46.31         |
| JAX00190231 | 8   | 3.43          | JAX00171082 | 9   | 49.80         |
| JAX00158713 | 8   | 9.53          | JAX00695061 | 9   | 56.92         |
| JAX00190239 | 8   | 14.53         | JAX00696373 | 9   | 63.51         |
| JAX00159268 | 8   | 16.95         | JAX00696900 | 9   | 66.11         |
| JAX00159808 | 8   | 26.43         | JAX00698952 | 9   | 76.24         |
| JAX00160567 | 8   | 36.56         | JAX00700236 | 9   | 83.38         |
| JAX00666793 | 8   | 42.98         | JAX00173791 | 9   | 86.06         |
| JAX00161163 | 8   | 44.56         | JAX00701802 | 9   | 92.42         |
| JAX00667095 | 8   | 44.88         | JAX00704097 | 9   | 103.02        |
| JAX00190302 | 8   | 53.24         | JAX00704581 | 9   | 105.81        |
| JAX00162173 | 8   | 59.70         | JAX00175541 | 9   | 109.55        |
| JAX00162404 | 8   | 62.80         | JAX00705853 | 9   | 112.65        |
| JAX00190312 | 8   | 66.73         | JAX00176095 | 9   | 116.96        |
| JAX00163022 | 8   | 71.06         | JAX00707462 | 9   | 118.91        |
| JAX00163156 | 8   | 72.86         | JAX00282080 | 10  | 7.51          |
| JAX00163548 | 8   | 78.06         | JAX00014851 | 10  | 10.13         |
| JAX00673875 | 8   | 83.88         | JAX00283234 | 10  | 13.52         |
| JAX00674224 | 8   | 86.04         | JAX00284586 | 10  | 20.60         |
| JAX00190351 | 8   | 89.28         | JAX00015834 | 10  | 23.31         |
| JAX00675742 | 8   | 92.99         | JAX00016105 | 10  | 26.93         |
| JAX00165121 | 8   | 99.05         | JAX00285956 | 10  | 27.00         |
| JAX00165438 | 8   | 103.29        | JAX00016116 | 10  | 27.07         |
| JAX00678797 | 8   | 105.63        | JAX00286536 | 10  | 30.62         |
| JAX00166114 | 8   | 112.30        | JAX00016388 | 10  | 30.72         |
| JAX00166553 | 8   | 118.14        | JAX00187308 | 10  | 43.69         |
| JAX00167128 | 8   | 125.82        | JAX00019034 | 10  | 66.30         |
| JAX00683747 | 8   | 129.11        | JAX00019069 | 10  | 66.76         |

23 Supplemental Table 1...*continued*

24

| SNP         | MMU | Position (Mb) | SNP         | MMU | Position (Mb) |
|-------------|-----|---------------|-------------|-----|---------------|
| JAX00019076 | 10  | 66.86         | JAX00030022 | 11  | 87.22         |
| JAX00019077 | 10  | 66.86         | JAX00318408 | 11  | 92.79         |
| JAX00019082 | 10  | 66.95         | JAX00030707 | 11  | 96.35         |
| JAX00019083 | 10  | 66.96         | JAX00031155 | 11  | 102.35        |
| JAX00019619 | 10  | 74.11         | JAX00031382 | 11  | 105.37        |
| JAX00293914 | 10  | 81.49         | JAX00031628 | 11  | 108.69        |
| JAX00020328 | 10  | 83.79         | JAX00031943 | 11  | 112.89        |
| JAX00020403 | 10  | 84.77         | JAX00032145 | 11  | 115.59        |
| JAX00020562 | 10  | 86.91         | JAX00187607 | 12  | 7.48          |
| JAX00295678 | 10  | 89.83         | JAX00325423 | 12  | 10.64         |
| JAX00020986 | 10  | 92.59         | JAX00033353 | 12  | 12.94         |
| JAX00021324 | 10  | 97.08         | JAX00327082 | 12  | 17.18         |
| JAX00021724 | 10  | 102.46        | JAX00327523 | 12  | 21.46         |
| JAX00022058 | 10  | 106.89        | JAX00329004 | 12  | 30.00         |
| JAX00299310 | 10  | 113.81        | JAX00331009 | 12  | 39.06         |
| JAX00300375 | 10  | 119.47        | JAX00035416 | 12  | 43.82         |
| JAX00023249 | 10  | 122.82        | JAX00332546 | 12  | 46.52         |
| JAX00023839 | 11  | 3.78          | JAX00036158 | 12  | 53.72         |
| JAX00024084 | 11  | 7.05          | JAX00036460 | 12  | 57.89         |
| JAX00024300 | 11  | 9.94          | JAX00335079 | 12  | 60.29         |
| JAX00304396 | 11  | 13.51         | JAX00187705 | 12  | 62.99         |
| JAX00304853 | 11  | 16.81         | JAX00037350 | 12  | 69.77         |
| JAX00025338 | 11  | 23.97         | JAX00037863 | 12  | 76.62         |
| JAX00306858 | 11  | 30.08         | JAX00339139 | 12  | 80.08         |
| JAX00026075 | 11  | 33.90         | JAX00038348 | 12  | 83.10         |
| JAX00026291 | 11  | 36.87         | JAX00340356 | 12  | 86.54         |
| JAX00026765 | 11  | 43.20         | JAX00038836 | 12  | 89.61         |
| JAX00187495 | 11  | 46.24         | JAX00341779 | 12  | 92.91         |
| JAX00311223 | 11  | 53.24         | JAX00342543 | 12  | 97.57         |
| JAX00312699 | 11  | 56.50         | JAX00345486 | 12  | 109.06        |
| JAX00311892 | 11  | 56.50         | JAX00346570 | 12  | 112.79        |
| JAX00313044 | 11  | 61.81         | JAX00348827 | 13  | 3.77          |
| JAX00314044 | 11  | 66.20         | JAX00041702 | 13  | 10.55         |
| JAX00314703 | 11  | 69.63         | JAX00350930 | 13  | 15.74         |
| JAX00315275 | 11  | 72.94         | JAX00351843 | 13  | 19.82         |
| JAX00029177 | 11  | 75.94         | JAX00352599 | 13  | 23.79         |
| JAX00029428 | 11  | 79.30         | JAX00043166 | 13  | 30.85         |
| JAX00316531 | 11  | 82.08         | JAX00353952 | 13  | 31.13         |

25 Supplemental Table 1...*continued*

26

| SNP         | MMU | Position (Mb) | SNP         | MMU | Position (Mb) |
|-------------|-----|---------------|-------------|-----|---------------|
| JAX00354948 | 13  | 36.43         | JAX00385628 | 14  | 82.64         |
| JAX00043830 | 13  | 39.77         | JAX00055542 | 14  | 86.00         |
| JAX00356785 | 13  | 45.37         | JAX00387018 | 14  | 92.60         |
| JAX00357304 | 13  | 47.75         | JAX00057997 | 14  | 119.28        |
| JAX00044483 | 13  | 48.47         | JAX00391461 | 14  | 120.36        |
| JAX00358182 | 13  | 52.92         | JAX00058152 | 14  | 121.35        |
| JAX00358965 | 13  | 56.25         | JAX00392026 | 15  | 3.52          |
| JAX00361017 | 13  | 63.68         | JAX00395686 | 15  | 23.96         |
| JAX00045772 | 13  | 67.39         | JAX00396199 | 15  | 26.49         |
| JAX00361784 | 13  | 69.58         | JAX00396735 | 15  | 30.15         |
| JAX00046473 | 13  | 76.89         | JAX00397321 | 15  | 32.39         |
| JAX00363824 | 13  | 77.78         | JAX00398163 | 15  | 37.07         |
| JAX00047202 | 13  | 86.64         | JAX00061061 | 15  | 39.43         |
| JAX00047414 | 13  | 89.55         | JAX00399798 | 15  | 45.76         |
| JAX00366239 | 13  | 93.31         | JAX00062446 | 15  | 57.94         |
| JAX00047888 | 13  | 96.52         | JAX00403855 | 15  | 66.01         |
| JAX00048133 | 13  | 99.78         | JAX00063060 | 15  | 66.11         |
| JAX00048392 | 13  | 103.23        | JAX00063396 | 15  | 70.59         |
| JAX00048913 | 13  | 110.19        | JAX00405318 | 15  | 72.18         |
| JAX00371280 | 13  | 116.19        | JAX00063956 | 15  | 78.07         |
| JAX00372896 | 14  | 10.05         | JAX00407012 | 15  | 80.08         |
| JAX00372971 | 14  | 10.46         | JAX00064382 | 15  | 83.77         |
| JAX00373057 | 14  | 10.89         | JAX00408215 | 15  | 85.97         |
| JAX00050520 | 14  | 16.28         | JAX00410365 | 15  | 94.59         |
| JAX00050720 | 14  | 19.02         | JAX00065772 | 15  | 102.33        |
| JAX00050905 | 14  | 21.51         | JAX00413022 | 16  | 6.77          |
| JAX00051084 | 14  | 23.95         | JAX00413176 | 16  | 7.55          |
| JAX00375557 | 14  | 24.69         | JAX00415862 | 16  | 24.34         |
| JAX00052010 | 14  | 36.75         | JAX00415942 | 16  | 24.89         |
| JAX00052052 | 14  | 37.29         | JAX00068044 | 16  | 32.34         |
| JAX00378576 | 14  | 39.70         | JAX00417972 | 16  | 35.48         |
| JAX00378943 | 14  | 44.50         | JAX00068339 | 16  | 36.27         |
| JAX00052649 | 14  | 46.67         | JAX00418604 | 16  | 39.65         |
| JAX00381940 | 14  | 63.19         | JAX00068876 | 16  | 43.43         |
| JAX00382398 | 14  | 66.14         | JAX00069480 | 16  | 51.50         |
| JAX00383174 | 14  | 69.46         | JAX00069872 | 16  | 56.73         |
| JAX00054877 | 14  | 76.86         | JAX00422529 | 16  | 59.78         |
| JAX00385288 | 14  | 79.90         | JAX00070376 | 16  | 63.50         |



27 Supplemental Table 1...*continued*

28

| SNP         | MMU | Position (Mb) | SNP         | MMU | Position (Mb) |
|-------------|-----|---------------|-------------|-----|---------------|
| JAX00070865 | 16  | 70.08         | JAX00084511 | 18  | 66.75         |
| JAX00424604 | 16  | 72.92         | JAX00463762 | 18  | 69.45         |
| JAX00071217 | 16  | 74.77         | JAX00464605 | 18  | 72.79         |
| JAX00071562 | 16  | 79.36         | JAX00085156 | 18  | 75.39         |
| JAX00071974 | 16  | 84.88         | JAX00465946 | 18  | 77.85         |
| JAX00072088 | 16  | 86.42         | JAX00468254 | 18  | 86.57         |
| JAX00072361 | 16  | 90.07         | JAX00086324 | 19  | 3.46          |
| JAX00428434 | 16  | 92.97         | JAX00470125 | 19  | 10.06         |
| JAX00429186 | 16  | 96.43         | JAX00087311 | 19  | 16.98         |
| JAX00429799 | 17  | 3.97          | JAX00472935 | 19  | 20.61         |
| JAX00073232 | 17  | 6.70          | JAX00473727 | 19  | 23.78         |
| JAX00431384 | 17  | 10.41         | JAX00474575 | 19  | 26.68         |
| JAX00073820 | 17  | 14.66         | JAX00088467 | 19  | 32.43         |
| JAX00432525 | 17  | 15.50         | JAX00476173 | 19  | 34.36         |
| JAX00436582 | 17  | 33.15         | JAX00089065 | 19  | 40.46         |
| JAX00075442 | 17  | 36.68         | JAX00478815 | 19  | 46.43         |
| JAX00438327 | 17  | 40.61         | JAX00479657 | 19  | 50.54         |
| JAX00439027 | 17  | 43.15         | JAX00480903 | 19  | 56.40         |
| JAX00440286 | 17  | 47.28         | JAX00709351 | X   | 11.55         |
| JAX00441944 | 17  | 53.15         | JAX00711215 | X   | 44.34         |
| JAX00077328 | 17  | 62.24         | JAX00711221 | X   | 44.34         |
| JAX00443940 | 17  | 66.24         | JAX00711351 | X   | 45.56         |
| JAX00444142 | 17  | 67.00         | JAX00179013 | X   | 46.96         |
| JAX00078196 | 17  | 74.18         | JAX00711759 | X   | 49.41         |
| JAX00447544 | 17  | 79.37         | JAX00712291 | X   | 55.80         |
| JAX00078883 | 17  | 83.33         | JAX00179551 | X   | 55.82         |
| JAX00449090 | 17  | 86.04         | JAX00179671 | X   | 57.42         |
| JAX00188476 | 17  | 89.63         | JAX00239349 | X   | 70.12         |
| JAX00452266 | 18  | 13.21         | JAX00180633 | X   | 70.40         |
| JAX00080770 | 18  | 16.70         | JAX00180639 | X   | 70.46         |
| JAX00081229 | 18  | 22.89         | JAX00180648 | X   | 70.59         |
| JAX00081764 | 18  | 30.02         | JAX00714006 | X   | 72.22         |
| JAX00455751 | 18  | 33.67         | JAX00715098 | X   | 83.17         |
| JAX00082288 | 18  | 37.04         | JAX00182389 | X   | 94.50         |
| JAX00458347 | 18  | 46.99         | JAX00182535 | X   | 96.43         |
| JAX00458892 | 18  | 50.23         | JAX00182562 | X   | 96.80         |
| JAX00460030 | 18  | 56.66         | JAX00182899 | X   | 101.40        |
| JAX00460887 | 18  | 59.82         | JAX00183346 | X   | 107.51        |

29 Supplemental Table 1...*continued*

30

| SNP         | MMU | Position (Mb) |
|-------------|-----|---------------|
| JAX00717956 | X   | 112.23        |
| JAX00184535 | X   | 126.02        |
| JAX00718909 | X   | 126.04        |
| JAX00185465 | X   | 138.78        |
| JAX00185820 | X   | 145.90        |
| JAX00186043 | X   | 148.89        |
| JAX00240371 | X   | 154.49        |
| JAX00722634 | X   | 159.44        |
| JAX00186887 | X   | 160.42        |
| JAX00187170 | X   | 164.22        |

31 Supplemental Table 2. *QTL detected and respective statistics for body mass and voluntary wheel-running traits. Values represent*  
 32 *LOD scores from simple mapping output that were significant at the genome-wide level ( $P \leq 0.05$ ,  $LOD \geq 3.9$ ), but did not remain*  
 33 *significant or suggestive ( $P \leq 0.1$ ,  $LOD \geq 3.5$ ) following the GRAIP procedure (and hence are not depicted in Table 3 of the primary*  
 34 *text).*

35

| Trait <sup>a</sup>               | Nearest Marker | MMU | Peak Position (Mb) | Naive LOD | GRAIP LOD | CI (Mb) <sup>d</sup> | % Var <sup>e</sup> | Additive <sup>f</sup><br>±SE | Dominance <sup>f</sup><br>±SE |
|----------------------------------|----------------|-----|--------------------|-----------|-----------|----------------------|--------------------|------------------------------|-------------------------------|
| Body Mass                        | JAX00511966    | 2   | 172.3              | 4.0       | 1.8       | 168-                 | 1.2                | -0.4±0.2                     | -0.8±0.3                      |
|                                  | JAX00645408    | 7   | 82.6               | 6.7       | 3.2       | 80-84                | 1.4                | 0.4±0.2                      | 0.9±0.3                       |
|                                  | JAX00700236    | 9   | 83.4               | 4.4       | 2.1       | 79-90                | 0.6                | 0.3±0.2                      | 0.6±0.3                       |
| <b><i>Distance</i></b>           |                |     |                    |           |           |                      |                    |                              |                               |
| Day 1                            | JAX00081229    | 18  | 22.9               | 4.4       | 2.8       | -31                  | 3.0                | 504.5±180.2                  | -937.0±232.9 <sup>†</sup>     |
| Slope (Days1-6) <sup>c</sup>     | JAX00008766    | 1   | 122.5              | 3.9       | 3.2       | 116-135              | 3.0                | 139.6±35.87                  | -75.1±53.1                    |
| Intercept (Days1-6) <sup>c</sup> | JAX00023249    | 10  | 122.8              | 4.5       | 2.9       | 121-                 | 2.5                | 265.8±192.1                  | -985.1±253.6                  |
| <b><i>Time</i></b>               |                |     |                    |           |           |                      |                    |                              |                               |
| Day 1                            | JAX00608826    | 6   | 46.8               | 5.7       | 3.4       | 26-50                | 2.6                | -38.0±8.8 <sup>†</sup>       | -17.6±13.5                    |
|                                  | JAX00025338    | 11  | 24.0               | 5.4       | 2.9       | 21-35                | 3.0                | -34.3±10.0                   | -37.4±13.5                    |
|                                  | JAX00081229    | 18  | 22.9               | 4.9       | 2.8       | -28                  | 2.6                | 15.7±10.7                    | -59.5±13.8 <sup>†</sup>       |
| Day 2                            | JAX00072088    | 16  | 86.4               | 4.1       | 2.7       | 82-91                | 3.2                | -34.5±8.4 <sup>†</sup>       | -18.2±11.0                    |
| Day 3                            | JAX00582506    | 5   | 52.9               | 4.1       | 3.4       | 50-59                | 2.5                | 20.6±7.5                     | 37.0±10.2                     |
| (Days 5+6)/2 <sup>b</sup>        | JAX00478815    | 19  | 46.4               | 4.2       | 3.0       | 40-49                | 1.3                | -18.7±6.8                    | 10.1±8.9                      |
| Slope (Days1-6) <sup>c</sup>     | JAX00081229    | 18  | 22.9               | 4.2       | 2.8       | 20-28                | 2.3                | -2.2±1.9                     | 8.7±2.4                       |
| Intercept (Days1-6) <sup>c</sup> | JAX00645408    | 7   | 82.6               | 5.5       | 3.2       | 75-86                | 3.5                | 23.5±9.6                     | -55.7±13.7 <sup>†</sup>       |

|                              |             |    |      |     |     |       |     |            |                      |
|------------------------------|-------------|----|------|-----|-----|-------|-----|------------|----------------------|
|                              | JAX00026075 | 11 | 33.9 | 4.9 | 3.0 | 29-39 | 2.8 | -28.4±9.7  | -37.3±13.9           |
|                              | JAX00081229 | 18 | 22.9 | 4.2 | 2.5 | 19-27 | 1.9 | 9.8±11.0   | -47.7±14.2           |
| <b>Average speed</b>         |             |    |      |     |     |       |     |            |                      |
| Day 2                        | JAX00131182 | 5  | 68.0 | 4.1 | 3.3 | 66-78 | 2.8 | 0.1±0.1    | 0.9±0.2 <sup>†</sup> |
| Day 3                        | JAX00131182 | 5  | 68.0 | 3.9 | 3.0 | 66-78 | 2.3 | -0.03±0.16 | 0.9±0.2 <sup>†</sup> |
| Slope (Days1-6) <sup>c</sup> | JAX00050520 | 14 | 16.3 | 4.3 | 3.4 | 14-18 | 2.8 | 0.09±0.03  | 0.17±0.05            |
| <b>Maximum Speed</b>         |             |    |      |     |     |       |     |            |                      |
| Day 6                        | JAX00131790 | 5  | 76.1 | 4.0 | 3.4 | 47-89 | 2.1 | -0.8±0.2   | 0.8±0.3              |
| Slope (Days1-6) <sup>c</sup> | JAX00025338 | 11 | 24.0 | 4.2 | 3.2 | 21-30 | 2.5 | 0.20±0.05  | -0.01±0.07           |

36

37 <sup>a</sup>Traits measured from a 6-day exposure to running wheels: body mass (g) prior to exposure to running wheels, running  
38 distance (revolutions / day), time spent running (i.e., cumulative 1-minute intervals in which at least one revolution was recorded),  
39 average speed (total revolutions / time spent running), and maximum speed (highest number of revolutions in any 1-minute interval  
40 within a 24 hour period). <sup>b</sup>Mean of days 5 and 6 of a 6-day exposure to running wheels. This is the criterion for which one strain  
41 (HR) was selectively bred (63). <sup>c</sup>Slope and intercept values from across the 6-day test. Slopes and intercepts were not calculated for  
42 individuals missing one or more days of wheel-running data. <sup>d</sup>Confidence intervals (CIs) for QTL positions were obtained using a 1.0  
43 LOD drop in Mb (relative to the Naive LOD score). <sup>e</sup>Percentage of phenotypic variance accounted for by the QTL effect. <sup>f</sup>For  
44 additive and dominance effects: positive values indicate increasing effect of the HR allele or increasing effect of the heterozygote,  
45 respectively. <sup>†</sup>Indicates additive and dominance effects were statistically significant at  $P < 0.05$ .
